# Supplementary material for: GLUT1-mediated effective anti-miRNA21 pompon for cancer therapy
Source: PubMed Central journal article supplement — Acta Pharm Sin B. 2019 Jan 28;9(4):832–42. doi: 10.1016/j.apsb.2019.01.012 (PMC6663942; doi:10.1016/j.apsb.2019.01.012), 2019-01-28
Supplement: mmc1.pdf [file mmc1.pdf]

Supplementary Information for

## **ORIGINAL ARTICLE**

# **GLUT1 mediated effective anti-miRNA21 pompon for cancer therapy**

Qin Guo, Chao Li, Wenxi Zhou, Xinli Chen, Yu Zhang, Yifei Lu, Yujie Zhang,  
Qinjun Chen, Donghui Liang, Tao Sun, Chen Jiang\*

*Key Laboratory of Smart Drug Delivery, Ministry of Education, State Key Laboratory of Medical Neurobiology, Department of Pharmaceutics, School of Pharmacy, Fudan University, Shanghai 201203, China*

\*Corresponding author. Tel./fax: +86 21 51980079.

E-mail address: [jiangchen@shmu.edu.cn](mailto:jiangchen@shmu.edu.cn) (Chen Jiang).

### **1. Stability test**

The nanopompons and nanospheres were placed in PBS 7.4. Size distribution was determined by laser scattering technique after a certain time interval ( $n=4$ ).

### **2. Gel permeation chromatography**

The molecular weight of pOEI and (DHA-)PEG-pOEI were measured by gel permeation chromatography (GPC). Molecular weight of pOEI, PEG-pOEI and DHA-PEG-pOEI were 9.8-, 14.6- and 14.7 kDa, respectively.

### **3. Acridine orange (AO) staining**

MB-MDA-231 cells were planked in a density of  $3 \times 10^3$  cells/well to glass-bottomed confocal dishes. After 24 h, nanopompons or DHA-nanopompons (5  $\mu$ g RNA/hole) were added into complete medium, respectively. Rapamycin was added at a final concentration of 50 nmol/L at the same time as a positive control. After incubation for 24 h, cells were stained with 1  $\mu$ mol/L AO for 10 min at 37 °C, then washed with Hank's solution for 3 times. The cells were observed with confocal laser scanning microscopy (CLSM, Carl Zeiss LSM710, Wetzlar, Germany) with emission at 530 nm and 640 nm (excitation at 488 nm).

### **4. Immunohistological staining study**

To further evaluate the biosafety of nanoparticles, TNBC models of different groups were sacrificed on day 18 and the main organs were harvested and fixed in 4% paraformaldehyde and embedded in paraffin. Hematoxylin and eosin (H&E) staining were conducted by Guge Biological Tech., Co., Ltd. (Shanghai, China).

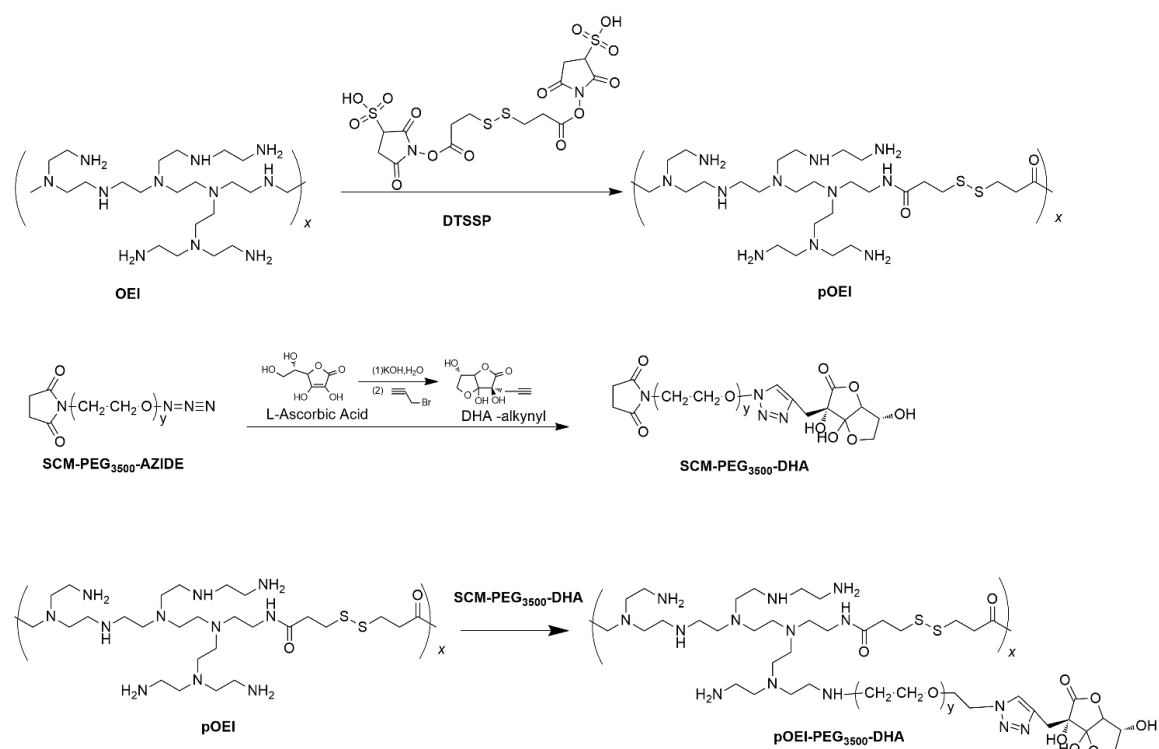

**Scheme S1** Synthetic route of DHA-PEG-pOEI.

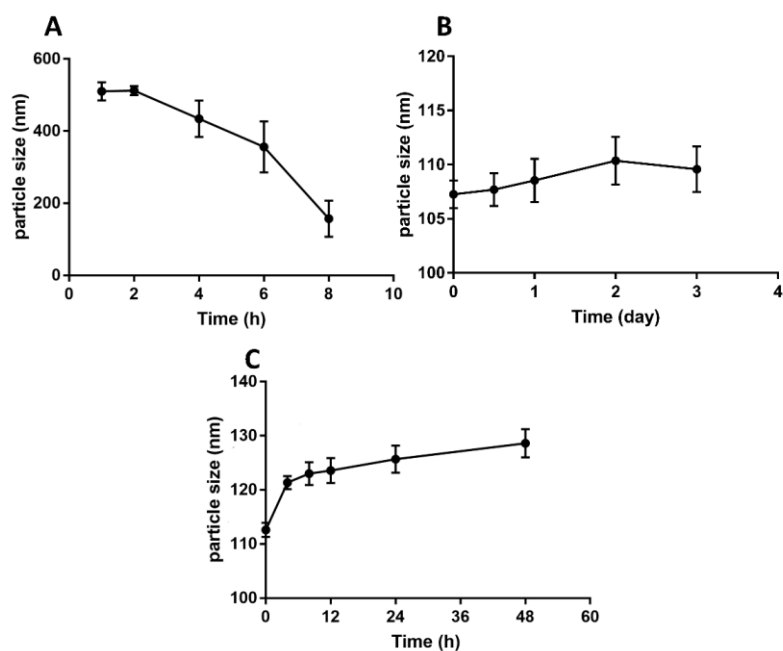

**Figure S1** (A) Stability test of anti-miR nanosphere in PBS (pH 7.4); (B) Stability test of anti-miR nanopompon in PBS (pH 7.4); (C) Stability test of anti-miR nanopompon in 10% FBS (pH 7.4).

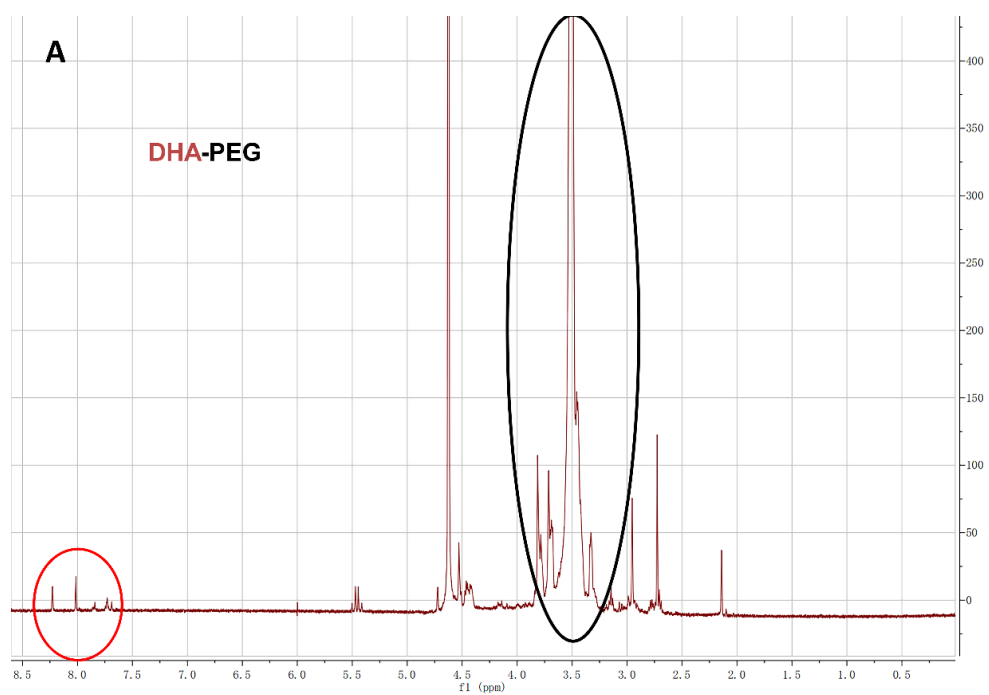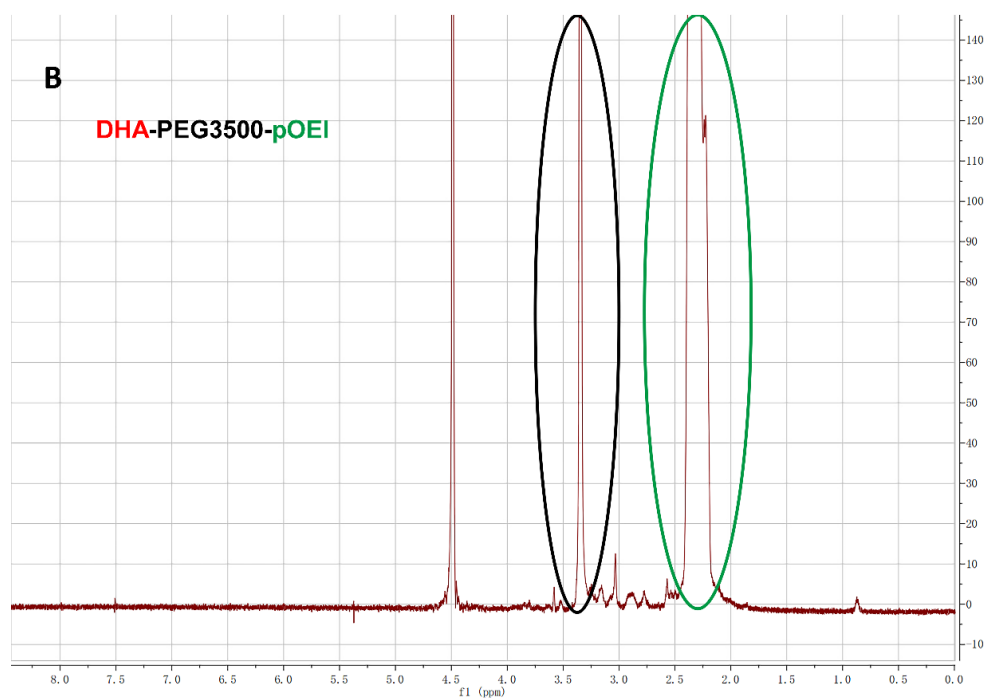

**Figure S2** (A)  $^1\text{H}$  NMR spectrum of DHA-PEG<sub>3500</sub>; (B)  $^1\text{H}$  NMR spectrum of DHA-PEG<sub>3500</sub>-pOEI.

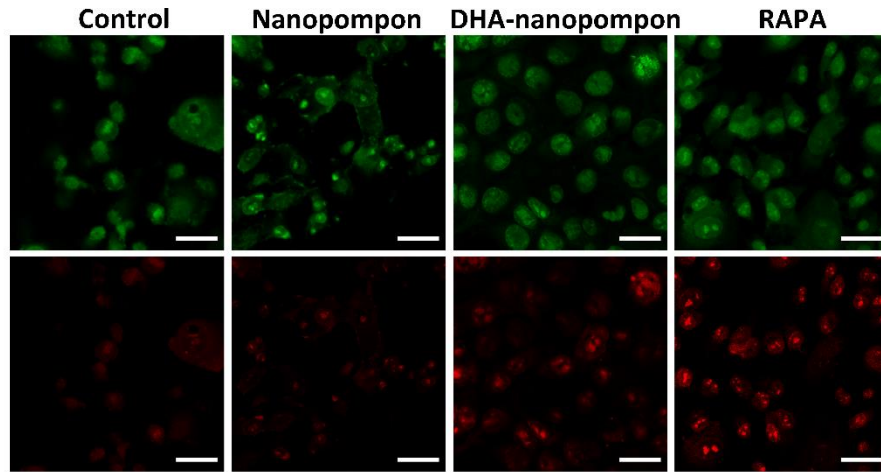

**Figure S3** CLSM images of AO-stained MB-MDA-231 cells after incubation with nanopompons, DHA-nanopompons and rapamycin as positive control for 24 h, respectively. Scale bars represent 200  $\mu\text{m}$ .

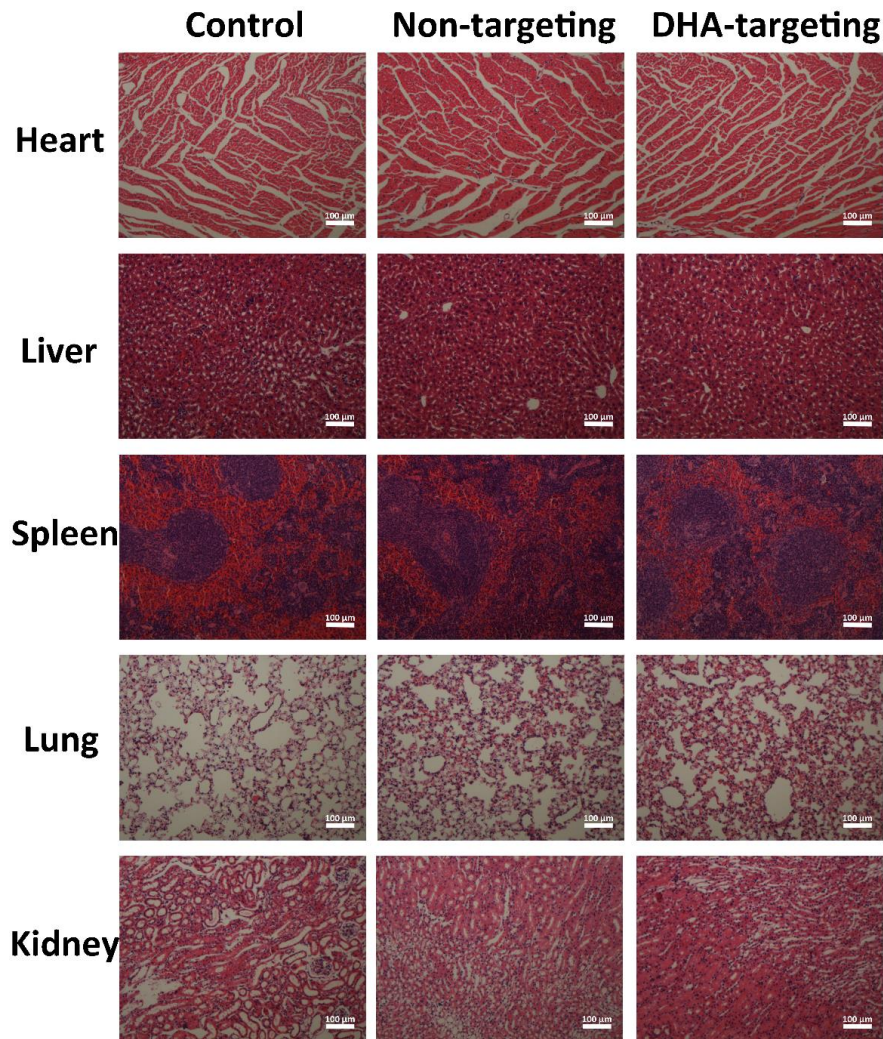

**Figure S4** H&E staining of saline (control), non-targeting nanopompons and DHA-targeting nanopompons. Scale bars represent 100  $\mu\text{m}$ .
